# Supplementary material for: Nutritional Status Associated with Molecular Biomarkers, Physiological Indices, and Clinical Severity in Parkinson’s Disease Patients
Source: PubMed Central journal article supplement (PMC7459923; doi:10.3390/ijerph17165727), 2020-08-07
Supplement: ijerph-17-05727-s001.pdf [file ijerph-17-05727-s001.pdf]

# Supplementary Materials: Nutritional Status Associated with Molecular Biomarkers, Physiological Indices, and Clinical Severity in Parkinson's Disease Patients

Tsu-Kng Lin <sup>1,2,3,\*</sup>, Yung-Yee Chang <sup>1,2</sup>, Nai-Ching Chen <sup>1</sup>, Chia-Wei Liou <sup>1,2,3</sup>, Min-Yu Lan <sup>1,2,3</sup>, Ying-Fa Chen <sup>1,2</sup> and Chia-Liang Tsai <sup>4,\*</sup>

**Table S1.** The relationships between the mini nutritional assessment (MNA), the scores of Unified Parkinson's Disease Rating Scale (UPDRS), and the levels of biochemical markers in the PD patients and PD patients with malnutrition risk.

| UPDRS                     | MNA                    | HgB                    | Cholesterol            | HDL                    | LDL                    | HbA1c                  | BUN                    | Creatinine             | Folate                 | VitB12                 |
|---------------------------|------------------------|------------------------|------------------------|------------------------|------------------------|------------------------|------------------------|------------------------|------------------------|------------------------|
| <b>Total participants</b> |                        |                        |                        |                        |                        |                        |                        |                        |                        |                        |
| Section 1                 | $r = -0.36; p = 0.001$ | $r = 0.04; p = 0.730$  | $r = -0.05; p = 0.671$ | $r = -0.29; p = 0.009$ | $r = 0.03; p = 0.765$  | $r = -0.17; p = 0.134$ | $r = 0.22; p = 0.054$  | $r = 0.12; p = 0.297$  | $r = 0.04; p = 0.729$  | $r = 0.24; p = 0.033$  |
| Section 2                 | $r = -0.35; p = 0.001$ | $r = 0.03; p = 0.768$  | $r = -0.02; p = 0.877$ | $r = -0.19; p = 0.092$ | $r = 0.03; p = 0.783$  | $r = -0.21; p = 0.069$ | $r = 0.14; p = 0.233$  | $r = -0.01; p = 0.902$ | $r = 0.03; p = 0.778$  | $r = 0.18; p = 0.108$  |
| Section 3                 | $r = -0.18; p = 0.100$ | $r = 0.07; p = 0.554$  | $r = -0.20; p = 0.070$ | $r = -0.13; p = 0.257$ | $r = -0.16; p = 0.146$ | $r = -0.16; p = 0.171$ | $r = 0.28; p = 0.013$  | $r = 0.10; p = 0.353$  | $r = -0.00; p = 0.989$ | $r = 0.17; p = 0.130$  |
| Section 4                 | $r = -0.07; p = 0.542$ | $r = -0.01; p = 0.945$ | $r = 0.03; p = 0.825$  | $r = -0.00; p = 0.996$ | $r = 0.04; p = 0.733$  | $r = -0.20; p = 0.077$ | $r = -0.07; p = 0.514$ | $r = -0.03; p = 0.807$ | $r = -0.02; p = 0.850$ | $r = -0.16; p = 0.179$ |
| Total scores              | $r = -0.29; p = 0.009$ | $r = 0.06; p = 0.604$  | $r = -0.14; p = 0.209$ | $r = -0.18; p = 0.109$ | $r = -0.09; p = 0.434$ | $r = -0.21; p = 0.060$ | $r = 0.24; p = 0.030$  | $r = 0.07; p = 0.521$  | $r = 0.01; p = 0.915$  | $r = 0.19; p = 0.102$  |
| MNA                       | -----                  | $r = 0.25; p = 0.022$  | $r = -0.13; p = 0.243$ | $r = -0.16; p = 0.171$ | $r = -0.08; p = 0.475$ | $r = 0.23; p = 0.041$  | $r = 0.05; p = 0.962$  | $r = 0.05; p = 0.640$  | $r = -0.02; p = 0.880$ | $r = 0.07; p = 0.567$  |
| <b>Malnutrition risk</b>  |                        |                        |                        |                        |                        |                        |                        |                        |                        |                        |
| Section 1                 | $r = -0.47; p = 0.020$ | $r = -0.27; p = 0.211$ | $r = 0.16; p = 0.452$  | $r = -0.38; p = 0.066$ | $r = 0.26; p = 0.219$  | $r = -0.51; p = 0.16$  | $r = 0.27; p = 0.207$  | $r = -0.08; p = 0.702$ | $r = 0.17; p = 0.467$  | $r = 0.23; p = 0.309$  |
| Section 2                 | $r = -0.47; p = 0.019$ | $r = -0.01; p = 0.962$ | $r = 0.10; p = 0.647$  | $r = -0.19; p = 0.385$ | $r = 0.14; p = 0.529$  | $r = -0.41; p = 0.056$ | $r = 0.08; p = 0.718$  | $r = -0.04; p = 0.859$ | $r = 0.17; p = 0.464$  | $r = 0.27; p = 0.230$  |
| Section 3                 | $r = -0.28; p = 0.189$ | $r = 0.04; p = 0.838$  | $r = -0.15; p = 0.496$ | $r = -0.06; p = 0.798$ | $r = -0.13; p = 0.532$ | $r = -0.51; p = 0.016$ | $r = 0.24; p = 0.270$  | $r = 0.09; p = 0.687$  | $r = 0.11; p = 0.619$  | $r = 0.33; p = 0.145$  |
| Section 4                 | $r = -0.08; p = 0.721$ | $r = -0.13; p = 0.536$ | $r = -0.03; p = 0.877$ | $r = -0.09; p = 0.667$ | $r = -0.04; p = 0.846$ | $r = 0.18; p = 0.411$  | $r = -0.14; p = 0.511$ | $r = -0.08; p = 0.701$ | $r = -0.25; p = 0.272$ | $r = -0.24; p = 0.304$ |

|              |                        |                        |                        |                        |                       |                        |                        |                       |                       |                       |
|--------------|------------------------|------------------------|------------------------|------------------------|-----------------------|------------------------|------------------------|-----------------------|-----------------------|-----------------------|
| Total scores | $r = -0.39; p = 0.058$ | $r = -0.01; p = 0.948$ | $r = -0.06; p = 0.798$ | $r = -0.14; p = 0.505$ | $r = -0.03; p = .900$ | $r = -0.51; p = 0.016$ | $r = 0.19; p = 0.375$  | $r = 0.03; p = 0.894$ | $r = 0.13; p = 0.579$ | $r = 0.31; p = 0.170$ |
| MNA          | -----                  | $r = 0.14, p = 0.527$  | $r = 0.23; p = 0.278$  | $r = 0.26; p = 0.221$  | $r = 0.15; p = 0.498$ | $r = 0.62; p = 0.002$  | $r = -0.04; p = 0.849$ | $r = 0.00; p = 0.998$ | $r = 0.14; p = 0.534$ | $r = 0.30; p = 0.188$ |

PD: Parkinson's disease; UPDRS: Unified Parkinson's Disease Rating Scale; HgB: hemoglobin; HbA1c: glycated hemoglobin; MNA: mini nutritional assessment; HDL: high-density lipoprotein; LDL: low-density lipoprotein; BUN: blood urea nitrogen.
